# Supplementary material for: A force-sensitive mutation reveals a non-canonical role for dynein in anaphase progression
Source: PubMed Central journal article supplement (PMC11215527; doi:10.1083/jcb.202310022), 2024-07-01

anti-Dhc

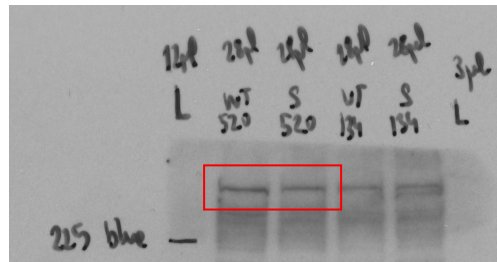

anti- $\alpha$ 1-Tubulin

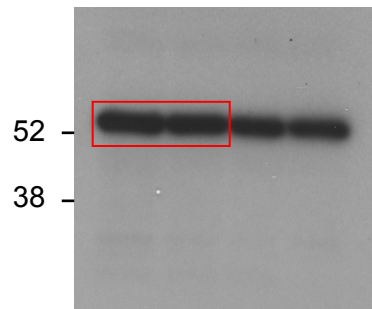

Supplement: JCB_202310022_SourceDataF2.pdf [file JCB_202310022_SourceDataF2.pdf]
